# Supplementary material for: Bed bugs (Cimex lectularius L.) exhibit limited ability to develop heat resistance
Source: PLoS One. 2019 Feb 7;14(2):e0211677. doi: 10.1371/journal.pone.0211677 (PMC6366730; doi:10.1371/journal.pone.0211677)
Supplement: S2 File — (XLSX) [file pone.0211677.s002.xlsx]

## Sheet: Harlan nymph Data
Large Nymphs
Exposure time-Minutes	Average Percentage Mortality	# dead bed bugs of 10
		Rep 1	Rep 2	Rep 3	Rep 4
10	0.0333333	1	0	0
12	0	0	0	0
13	0.0666667	0	0	2
14	0.2	3	3	2	0
16	0.633333	3	7	9
17	0.533333	5	6	5
18	0.833333	8	8	9
20	0.95	10	10	8	10
21	0.975	10	10	9	10
22	1	10	10	10	10
23	1	10	10	10
24	1	10	10	10
25	1	10	10	10
Heat Selection Nymphs	Survivorship	# of bed bugs surviving of 10
Exposure time-17.45-D1	Average Percentage	Rep 1	Rep 2	Rep 3	Rep 4	Rep 5	Rep 6	Rep 7	Rep 8	Rep 9	Rep 10	Rep 11	Rep 12	Rep 13	Rep 14	Rep 15	Rep 16	Rep 17	Rep 18	Rep 19	Rep 20	Rep 21	Rep 22	Rep 23	Rep 24	Rep 25	Rep 26	Rep 27	Rep28	Rep 29	Rep 30
F0	0.263333	2	2	1	0	0	2	3	7	2	4	2	0	0	4	3	4	0	0	0	0	8	6	7	1	4	6	2	3	3	3
Exposure time-17.45-D1	Average Percentage	Rep 1	Rep 2	Rep 3	Rep 4	Rep 5	Rep 6	Rep 7	Rep 8	Rep 9	Rep 10	Rep 11	Rep 12	Rep 13	Rep 14	Rep 15	Rep 16	Rep 17	Rep 18	Rep 19	Rep 20
F2	0.505	4	0	6	2	1	3	0	7	6	5	7	6	7	6	8	5	7	8	6	7
Exposure time-17.45-D1	Average Percentage	Rep 1	Rep 2	Rep 3	Rep 4	Rep 5	Rep 6	Rep 7	Rep 8	Rep 9	Rep 10	Rep 11	Rep 12	Rep 13	Rep 14	Rep 15	Rep 16	Rep 17	Rep 18	Rep 19	Rep 20	Rep 21	Rep 22	Rep 23	Rep 24	Rep 25	Rep 26	Rep 27
F3	0.555	7	5	4	6	5	8	7	5	4	9	5	7	3	5	4	9	6	6	3	8	7	3	4	6	8	7	2
Exposure time-17.45-D1	Average Percentage	Rep 1	Rep 2	Rep 3	Rep 4	Rep 5	Rep 6	Rep 7
F4	0.314286	10	0	2	0	9	0	1
Exposure time-17.45-D1	Average Percentage	Rep 1	Rep 2	Rep 3	Rep 4	Rep 5
F5	0.26	0	1	5	4	3
Exposure time-17.45-D1	Average Percentage	Rep 1	Rep 2	Rep 3	Rep 4	Rep 5
F6	0.2	3	1	3	2	1
Exposure time-17.45-D1	Average Percentage	Rep 1	Rep 2	Rep 3	Rep 4	Rep 5	Rep 6	Rep 7	Rep 8	Rep 9
F7	0.277778	6	4	0	0	0	2	1	6	6

## Sheet: Step-function Data
Harlan	Average Percentage Mortality	# dead of 10 bed bugs					Step-function bioassays
Exposure time-Minutes		Rep 1	Rep 2	Rep 3	Rep 4
10	0.0666667	0	2	0
12	0.2	4	2	0
13	0.4	9	3	0
14	0.5	6	1	8
16	0.533333	2	6	8
17	0.666667	6	4	10
18	0.933333	10	8	10
20	0.966667	9	10	10
21	0.966667	10	10	9
22	1	10	10	10
23	1	10	10	10
24	1	10	10	10
25	1	10	10	10
26	1	10	10	10
27	1	10	10	10
28	1	10	10	10
29	1	10	10	10
30	1	10	10	10
McCall, FL	Average Percentage Mortality	# dead of 10 bed bugs
Exposure time-Minutes		Rep 1	Rep 2	Rep 3	Rep 4
10	0	0	0	0
12	0.1	0	0	3
13	0.1	0	3	0
14	0.233333	0	6	1
16	0.233333	1	5	1
17	0.3	3	3	3
18	0.525	1	8	4	8
20	0.675	8	7	8	4
21	0.8	7	8	9
22	0.966667	9	10	10
23	1	10	10	10	10
24	1	10	10	10
25	1	10	10	10	10
26	1	10	10	10
27	1	10	10	10
28	1	10	10	10
29	1	10	10	10
30	1	10	10	10
Richmond, VA	Average Percentage Mortality	# dead of 10 bed bugs
Exposure time-Minutes		Rep 1	Rep 2	Rep 3	Rep 4
10	0.0333333	0	1	0
12	0.266667	6	1	1
13	0.333333	2	6	2
14	0.333333	3	5	2
16	0.5	9	9	1
17	0.733333	4	8	10	1
18	0.766667	8	10	5
19	0.8	5	10	9
20	0.8	10	9	5
21	0.966667	10	10	9
22	0.966667	10	10	9
23	0.966667	10	10	9
24	0.966667	10	10	9
25	0.966667	10	10	9
26	1	10	10	10
27	1	10	10	10
28	1	10	10	10
29	1	10	10	10
30	1	10	10	10
Poultry House, TN	Average Percentage Mortality	# dead of 10 bed bugs
Exposure time-Minutes		Rep 1	Rep 2	Rep 3	Rep 4
10	0.1	0	1	2
12	0.175	4	1	2	0
13	0.533333	8	8	0
14	0.4	5	1	6
16	0.633333	10	9	0
17	0.766667	9	8	6
18	0.6	4	6	8
20	0.9	10	8	9
21	0.9	10	7	10
22	0.9	10	10	7
23	0.9	10	10	7
24	0.966667	9	10	10
25	1	10	10	10
26	1	10	10	10
27	1	10	10	10
28	1	10	10	10
29	1	10	10	10
30	1	10	10	10
Knoxville, TN	Average Percentage Mortality	# dead of 10 bed bugs
Exposure time-Minutes		Rep 1	Rep 2	Rep 3	Rep 4
10	0	0	0	0
11	0	0	0	0
12	0.0333333	1	0	0
13	0.133333	2	1	1
14	0.133333	0	2	2
15	0.133333	3	1	0
16	0.2	1	3	2
17	0.533333	10	4	2
18	0.633333	6	10	3
20	0.8	10	7	7
21	0.8	7	9	8
22	0.866667	8	8	10
23	0.9	10	10	7
24	0.9	9	8	10
25	0.9	9	10	8
26	1	10	10	10
27	1	10	10	10
28	1	10	10	10
29	1	10	10	10
30	1	10	10	10
KVS, FL	Average Percentage Mortality	# dead of 10 bed bugs
Exposure time-Minutes		Rep 1	Rep 2	Rep 3	Rep 4
10	0	0	0	0
12	0	0	0	0
13	0	0	0	0
14	0.0333333	1	0	0
16	0.1	3	0	0
17	0.233333	3	2	2
18	0.3	5	1	3
20	0.533333	4	7	5
21	0.733333	7	8	7
22	0.766667	10	6	7
23	0.825	6	10	10	7
24	0.825	8	6	10	9
25	0.8	8	6	10
26	0.966667	9	10	10
27	1	10	10	10
28	1	10	10	10
29	1	10	10	10
30	1	10	10	10
Lafayette, IN	Average Percentage Mortality	# dead of 10 bed bugs
Exposure time-Minutes		Rep 1	Rep 2	Rep 3	Rep 4
10	0	0	0	0
12	0.025	1	0	0	0
13	0.133333	4	0	0
14	0.166667	1	1	3
16	0.166667	3	2	0
17	0.566667	3	6	8
18	0.766667	10	7	6
20	0.833333	8	10	7
21	0.866667	9	10	7
22	0.866667	8	9	9
23	0.9	9	9	9
24	0.933333	10	10	8
25	1	10	10	10
26	1	10	10	10
27	1	10	10	10
28	1	10	10	10
29	1	10	10	10
30	1	10	10	10
Hackensack, NJ	Average Percentage Mortality	# dead of 10 bed bugs
Exposure time-Minutes		Rep 1	Rep 2	Rep 3	Rep 4
10	0	0	0	0
12	0.0666667	0	1	1
13	0.166667	2	0	3
14	0.3	1	5	3
16	0.333333	4	2	4
17	0.533333	8	7	1
18	0.633333	6	9	4
20	0.7	7	9	5
21	0.833333	8	7	10
22	0.933333	9	9	10
23	1	10	10	10
24	1	10	10	10
25	1	10	10	10
26	1	10	10	10
27	1	10	10	10
28	1	10	10	10
29	1	10	10	10
30	1	10	10	10
Bradenton, FL	Average Percentage Mortality	# dead of 10 bed bugs
Exposure time-Minutes		Rep 1	Rep 2	Rep 3	Rep 4
10	0	0	0	0
12	0.0666667	2	0	0
13	0.0666667	0	0	2
14	0.133333	3	1	0
16	0.366667	3	4	4
17	0.4	4	8	2	2
18	0.433333	2	6	5
20	0.666667	5	5	10
21	0.7	7	5	9
22	0.933333	10	9	9
23	0.933333	9	9	10
24	0.933333	10	9	9
25	1	10	10	10
26	1	10	10	10
27	1	10	10	10
28	1	10	10	10
29	1	10	10	10
30	1	10	10	10
Raleigh, NC	Average Percentage Mortality	# dead of 10 bed bugs
Exposure time-Minutes		Rep 1	Rep 2	Rep 3	Rep 4
10	0	0	0	0
12	0.0666667	1	0	1
13	0.1	1	2	0
14	0.1	1	1	1
16	0.4	4	3	5
17	0.65	4	7	5	10
18	0.85	10	10	10	4
20	0.95	10	10	10	8
21	1	10	10	10
22	1	10	10	10
23	1	10	10	10
24	1	10	10	10
25	1	10	10	10
26	1	10	10	10
27	1	10	10	10
28	1	10	10	10
29	1	10	10	10
30	1	10	10	10

## Sheet: Ramp-function Data
	# dead of 10 bed bugs
Population	Rep 1	Rep 2	Rep 3
Harlan	10	10	10
Hackensack	10	10	10
KVS	10	10	10
Bradenton	10	10	10
Raleigh	10	10	10
Lafayette	10	10	10
McCall	10	10	10
Richmond	10	10	10
Poultry House	10	10	10
Knoxville	10	10	10

## Sheet: Feeding Data
Heat Selected Nymps	% of bed bugs feeding to repletion
	Day 5 Feeding	Day 8 Feeding	Day 11 Feeding	Day 14 Feeding
R1	0.272727	0.705882	0.794118	0.962963
R2	0.716667	0.75	0.966667	0.966667
R3	0.56	0.583333	0.909091	0.954545
R4	0.612903	0.709677	0.967742	0.967742
R5	0.289474	0.447368	0.736842	0.763158
R6	0.68	0.82	0.9	0.92
AVG	0.521962	0.669377	0.879077	0.922512
STE	0.0793246	0.0544167	0.0384365	0.0326894
Control Nymphs	% of bed bugs feeding to repletion
	Day 5 Feeding	Day 8 Feeding	Day 11 Feeding	Day 14 Feeding
R1	0.939394	0.969697	0.969697	1
R2	0.966667	0.966667	1	1
R3	0.95	0.95	0.975	1
R4	0.83871	0.935484	0.967742	0.967742
R5	0.972222	0.944444	1	0.973684
R6	0.96	1	1	1
AVG	0.937832	0.961049	0.985406	0.990238
STE	0.0203971	0.00944262	0.00659806	0.00806452

## Sheet: Latitude Data
Population	LT50 at 45°C (mins)	LT99 at 45°C (mins)	Latitude (degrees)
Harlan	14.3	23.21	40.006
Hackensack	16.5	26.25	40.889
KVS	19.7	29.23	28.3
Bradenton	17.6	27.63	27.48
Raleigh	16.3	22.3	35.76
Lafayette	16.9	26.42	40.41
McCall	17.1	26.25	30.33
Richmond	15.1	26.25	37.533
Poultry House	14.5	27.82	35.97
Knoxville	17.4	28.31	35.97
